# Supplementary material for: The first example of palladium catalysed non-perfectly alternating copolymerisation of ethene and carbon monoxideElectronic supplementary information (ESI) available: ligand syntheses and NMR analyses of copolymers. See http://www.rsc.org/suppdata/cc/b1/b111629k/
Source: Royal Society of Chemistry journal article supplement (doi:10.1039/b111629k), 2002-04-03
Supplement: b111629k.doc [file b111629k.doc]

# Supplementary data

**The first example of palladium catalysed non-perfectly alternating copolymerisation of ethene and carbon monoxide**

Eite Drent, Rudmer van Dijk, Roel van Ginkel, Bart van Oort and Robert. I. Pugh*.

Shell Research and Technology Amsterdam, Badhuisweg 3, 1031 CM Amsterdam, The Netherlands. Fax: 0031 (0)206303010; Tel: +31 (0)206303016;

E-mail: Robert.R.Pugh@opc.shell.com

# Electronic Supplementary Information

**1. Ligand syntheses**

General Considerations

All reactions were carried out under a dry argon or nitrogen atmosphere using standard Schlenk line techniques. Pro-analysis grade solvents were obtained from Merck or Aldrich and dried (as appropriate, THF over sodium/benzophenone or obtained pre-dried and stored over molecular sieves) and deoxygenated prior to use. Commercial reagents were used as supplied unless otherwise stated. Benzenesulphonicacid was dried by Dean-Stark distillation prior to use.

1H (chemical shifts relative to residual solvent) and 31P{1H} (chemical shifts to high frequency of H3PO4) NMR spectra were recorded on either a Varian 300 MHz or Inova 400 MHz spectrometer at the ambient temperature of the probe unless otherwise stated, using deuterated solvents to provide the field/frequency lock.

**2-lithioanisole**

To a stirred solution of anisole (91 g, 0.84 mol) and TMEDA (8.1 g, 70 mmol) in MTBE (250 ml) was added *n*-HexLi (282 ml, 0.7 mol, 2.5 M in hexane) over 1 h, maintaining the temperature below 25 °C. The reaction was refluxed for 8h, and after cooling to room temperature, GC analysis after quenching with Me3SiCl showed > 99% conversion of *n*-HexLi and formation of the corresponding amount of *o*-lithiated anisole.

***N,N*-diethylaminodichlorophosphine, Cl2PNEt2**

To a stirred solution of PCl3 (109.9 g, 0.8 mol) in hexane (500 ml) was added HNEt2 (117 g, 1.6 mol) at 0 °C over 1 h. After warming to room temperature and stirring for 2 h, the inorganic salts were filtered off and washed with hexane (3 x 100 ml). The crude product was distilled under vacuum (7 mbar, 67 °C) to yield Cl2PNEt2 as a colourless liquid (120 g, 87%). 1H NMR (CD2Cl2): δ = 1.20 (t, 6H, 2C*H*3), 3.36 (m, 4H, 2C*H*2); 31P NMR (CD2Cl2): δ = 162.0 ppm.

***N,N*-diisopropylaminodichlorophosphine, Cl2PNiPr2** was prepared in the same way in 88 % yield, except that the reaction temperature was raised to 40 °C and the distillation was carried out at 7 mbar/88 °C. 1H NMR (CD2Cl2): δ (ppm) = 1.30 (d, 12H, 4C*H*3), 4.0 (m, 2H, 2C*H*); 31P NMR (CD2Cl2): δ = 169.4 ppm.

## *N,N*-diethylamino-bis(2-methoxyphenyl)phosphine, An2PNEt2

To a stirred suspension of crude 2-lithioanisole (see above, *ca.* 0.7 mol) in MTBE was added Cl2PN(iPr)2 (58.0 g, 0.33 mol) in MTBE (150 ml) at such a rate that the temperature was kept below 25 °C. After stirring at room temperature for 4 h, H2O (250 ml) was added. The aqueous layer was extracted with MTBE (2 x 100 ml) and the combined organic layers were washed with H2O (2 x 100 ml). The solvent removed *in vacuo* (traces of anisole were removed at 55 °C, 1 mbar for 2 h) to afford An2PNEt2 as a white solid (103 g, 97%). 1H NMR (CD2Cl2): δ = 0.94 (t, 6H, 2C*H*3), 3.10 (m, 4H, 2C*H*2), 3.26 (s, 6H, 2OC*H*3), 6.5-7.4 (m, 8H, arom.); 31P NMR (CD2Cl2): δ = 43.1 ppm.

**bis(2-methoxyphenyl)methoxyphosphine, An2P(OMe)**

A stirred solution of An2PNEt2 (103 g, 325 mmol) in MeOH (200 ml) was heated to 65 °C for 4 h. After cooling to room temperature, the solvent was removed *in vacuo* to yield An2P(OMe) as a white solid (88.5 g, 99%). 1H NMR (CD2Cl2): δ = 3.68 (d, 3H, POC*H*3), 3.82 (s, 6H, 2OC*H*3), 6.9-7.4 (m, 8H, arom.); 31P NMR (CD2Cl2): δ = 101.7 ppm.

## 2-{bis(2-methoxyphenyl)phosphino}benzenesulphonicacid (1a)

To a solution of dry benzensulfonicacid (5.2 g, 32.9 mmol) in THF (60 ml) was added *n*-HexLi (25 ml, 62 mmol, 2.5M in hexane) at 0 °C. After stirring for 20 hours at room temperature, a solution of bis-(2-methoxybenzene) methoxy phosphine (9.1 g, 32.9 mmol) in THF (20 ml) was added dropwise at 20 °C and the reaction was stirred for a further 16 hours. After this time NH4Cl (3.4 g, 62 mmol) was added, the solvent removed *in vacuo* followed by addition of H2O (100 ml). The mixture was washed with MTBE (2 x 40 ml) and acidified to pH 2 with HCl (37 % in H2O). After extraction with CH2Cl2 (2 x 60 ml) the crude product was dried over MgSO4 and cooled to -35 °C. The resulting white crystals were filtered and dried to yield ligand **1a** (3.72 g, 28 %). 1H NMR (C2D2Cl4, 400 MHz, -25 °C) δ = 9.25 (d, 1*J*PH = 607 Hz, P*H*), 6.7-8.2 (m, 12H, arom.), 3.79 (s, 6H, 2OC*H*3); 31P NMR (CD2Cl2) δ = -9.8 ppm.

## bis(2-ethoxyphenyl)diisopropylaminophosphine

To a stirred solution of ethoxybenzene (19.8 g, 162 mmol) in MTBE (80 ml) was added *n*-HexLi (55 ml, 137 mmol, 2.5M in hexane) at such a rate that the temperature was kept below 25 °C. After stirring at 60 °C for 16 hours Cl2PN(iPr)2 (12.5 g, 61.9 mmol) in n-hexane (35 ml) was added dropwise at 2 °C. The reaction was then stirred at 45 °C for 16 hours, cooled to room temperature and washed with H2O (3 x 50 ml). The organic layer was separated, dried over MgSO4 and the solvent removed *in vacuo* to yield the crude product, whose 31P{1H} spectrum (CD2Cl2) showed a clean singlet at 19.6 ppm.

## bis(2-ethoxyphenyl)methoxyphosphine

A solution of crude bis(2-ethoxyphenyl)diisopropylaminophosphine in MeOH (100 ml) was stirred for 4 hours at 65 °C. After cooling to -35 °C the resulting crystals were filtered off and recrystallised from MeOH (40 ml) at room temperature to yield a white solid (10 g, 20 % from ethoxybenzene). 1H NMR (C6D6) δ (ppm) = 6.4-7.5 (m, 8H, arom.), 3.59 (d, 3*J*PH = 14.1 Hz, 3H, POC*H*3), 3.55-3.45 (m, 4H, 2OC*H*2CH3), 0.96 (t, 6H, 2OCH2C*H*3); 31P NMR (C6D6) δ = 105.0 ppm.

## 2-{bis(2-ethoxyphenyl)phosphino}benzenesulphonicacid (1b)

To a solution of dry benzensulfonicacid (5.02 g, 31.7 mmol) in THF (60 ml) was added *n*-HexLi (25 ml, 62 mmol, 2.5M in hexane) at 0 °C. After stirring for 16 hours at room temperature a solution of bis(2-ethoxyphenyl)methoxyphosphine (8.5 g, 28 mmol) in THF (25 ml) was added dropwise at 20 °C and the reaction was stirred for a further 16 hours. After this time NH4Cl (3.4 g, 62 mmol) was added, the solvent removed *in vacuo* followed by addition of H2O (100 ml). The mixture was washed with MTBE (2x 40 ml) and acidified to pH 2 with HCl (37 % in H2O). After extraction with CH2Cl2 (2 x 60 ml) the crude product was dried over MgSO4 and cooled to -35 °C. The resulting white crystals were filtered and dried *in vacuo* to yield ligand **1b** (5.42 g, 45 %). 1H NMR (C2D2Cl4, 400MHz, -25 °C) δ = 9.12 (d, 1*J*PH = 596 Hz, 1H, P*H*), 6.9-8.2 (m, 12H, arom.), 3.91 (q, 3*J*HH = 7.0 Hz, 4H, 2OC*H2*CH3), 0.93 (t, 3*J*HH = 7.1 Hz, 6H, 2OCH2C*H3*); 31P NMR (C2D2Cl4, 400MHz, -25 °C) δ = -7.62 ppm.

### bis(2-isopropoxyphenyl)diisopropylaminophosphine

To a stirred solution of isopropoxybenzene (24.9 g, 183 mmol) in MTBE (100 ml) was added *n*-HexLi (65 ml, 162 mmol, 2.5M in hexane) at such a rate that the temperature was kept below 25 °C. After stirring at 60 °C for 16 hours Cl2PN(iPr)2 (15 g, 74 mmol) in MTBE (35 ml) was added dropwise at 2 °C. The reaction was then stirred at 60 °C for 4 days, cooled to room temperature and washed with H2O (3 x 60 ml). The organic layer was separated, dried over MgSO4 and the solvent removed *in vacuo* to yield the crude product whose 31P{1H} spectrum (CD2Cl2) showed a singlet at 21.1 ppm.

## bis(2-isopropoxyphenyl)methoxyphosphine

A solution of crude bis(2-isopropoxyphenyl)diisopropylaminophosphine in MeOH (100 ml) was stirred for 16 hours at 85 °C. After cooling to -35 °C the crystals were filtered off and recrystallised from MeOH (40 ml) at 5 °C to yield a white solid (6 g, 10 %). 1H NMR (CDCl3, 300 MHz) δ = 6.5-7.6 (m, 8H, arom.), 4.14 (septet, 3*J*HH = 6.1 Hz, 2H, 2OC*H*), 3.57 (d, 3*J*PH = 14.1 Hz, 3H, POC*H3*), 1.01 (d, 3*J*HH = 6.2, 6H, OCH(C*H3*)2), 0.95 (d, 3*J*HH = 6.2, 6H, OCH(C*H3*)2), 31P NMR (C6D6) δ = 105.8 ppm.

## 2-{bis(2-isopropoxyphenyl)phosphino}benzenesulphonicacid (1c)

To a solution of dry benzensulfonicacid (2.85 g, 18 mmol) in THF (25 ml) was added *n*-HexLi (14 ml, 36 mmol, 2.5M in hexane) at 0 °C. After stirring for 16 hours at room temperature a solution of bis(2-isopropoxyphenyl)methoxyphosphine (5.48 g, 16.5 mmol) in THF (15 ml) was added dropwise at 20 °C and the reaction was stirred for a further 3 days. After this time NH4Cl (1.9 g, 36 mmol) was added, the solvent removed *in vacuo* followed by addition of H2O (50 ml). The mixture was washed with MTBE (2 x 40 ml) and acidified to pH 2 with HCl (37 % in H2O). After extraction with CH2Cl2 (3 x 40 ml) the crude product was dried over MgSO4 and cooled to 5 °C. The resulting white crystals were filtered and dried to yield ligand **1c** (2.34 g, 31 %). 1H NMR (C2D2Cl4, 400MHz, -25 °C) δ = 9.09 (d, 1*J*PH = 597 Hz, 1H, P*H*), 6.9-8.2 (m, 12H, arom.), 4.49 (septet, 3*J*HH = 6.1 Hz, 2H, 2OC*H*(CH3)2), 0.95 (d, 3*J*HH = 6.0 Hz, 6H, OCH(C*H*3)2), 0.91 (d, 3*J*HH = 6.0 Hz, 6H, OCH(C*H*3)2); 31P NMR (C2D2Cl4, 400MHz, -25 °C) δ = -6.55 ppm.

**2. NMR analyses of copolymers**

13C{1H} NMR copolymer analyses were measured in hexafluoroisopropanol/C6D6 (10 mm NMR tubes) on an Inova 400 MHz spectrometer (chemical shifts relative to C6D6). 13C{1H} NMR spectra were simulated (using ACD/ChemSketch, version 3.6) to compare calculated and observed chemical shifts of the non-alternating copolymers (see Table 1), showing good agreement. Although some of the observed resonances do not fall within the error of those simulated, it is noteworthy that the calculated chemical shifts do not take solvent effects into consideration; furthermore the observed values for the perfectly alternating polyketone resonances (δ 35.6 [*C*H2*C*H2C(O)]n; δ 212.9 [CH2CH2*C*(O)]n), unlike the calculated values (δ 37.4 (1.7) [*C*H2*C*H2C(O)]n; δ 207.9 (1.6) [CH2CH2*C*(O)]n), are in accordance with those reported (δ 35-37[*C*H2*C*H2C(O)]n; δ 211-214 [CH2CH2*C*(O)]n).1

**Table 1** Observed *vs.* calculated (error in parentheses) 13C{1H} NMR chemical shifts (in ppm) for spectra shown in Figures 1 and 3 of manuscript

|  | ***a*** | ***b*** | ***c*** | ***d*** | ***e*** | ***f*** | ***g*** | ***h*** | ***i*** | ***j*** | ***k*** | ***l*** |
| --- | --- | --- | --- | --- | --- | --- | --- | --- | --- | --- | --- | --- |
| Obs/ | 42.1 | 23.0 | 42.6 | 23.7 | 28.6 | 42.9 | 24.0 | 28.9 | 42.9 | 48.0 | 24.3 | 10.0 |
| **Calc/** | 42.6  (0.4) | 24.1  (0.6) | 42.7  (0.4) | 23.7  (0.5) | 29.1  (0.5) | 42.7  (0.4) | 23.7  (0.5) | 29.2  (1.0) | 44.6  (3.4) | 49.4  (4.2) | 26.0  (0.7) | 12.1  (0.4) |
